# Supplementary material for: Single cell sequencing maps skeletal muscle cellular diversity as disease severity increases in dystrophic mouse models
Source: PubMed Central journal article supplement (PMC9646951; doi:10.1016/j.isci.2022.105415), 2022-10-21
Supplement: mmc1.pdf [file mmc1.pdf]

**Supplemental information**

**Single cell sequencing maps skeletal muscle**

**cellular diversity as disease**

**severity increases in dystrophic mouse models**

**Kholoud K. Saleh, Haibin Xi, Corey Switzler, Emily Skuratovsky, Matthew A. Romero, Peggie Chien, Devin Gibbs, Lily Gane, Michael R. Hicks, Melissa J. Spencer, and April D. Pyle**

**A**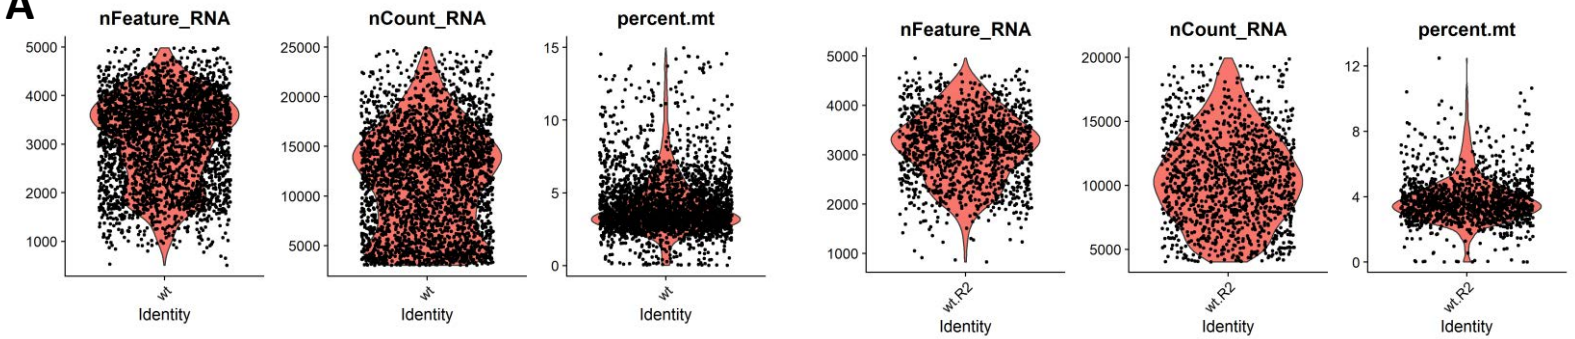**B**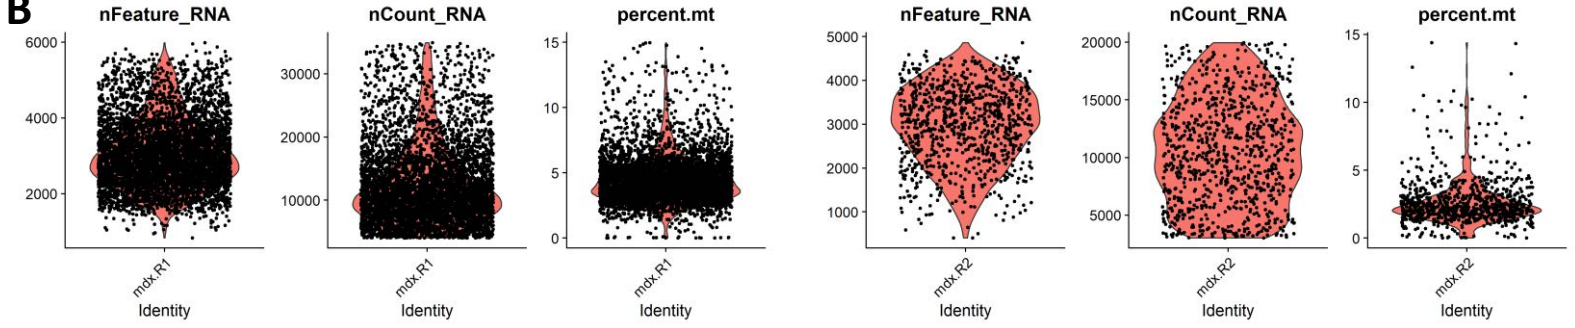**C**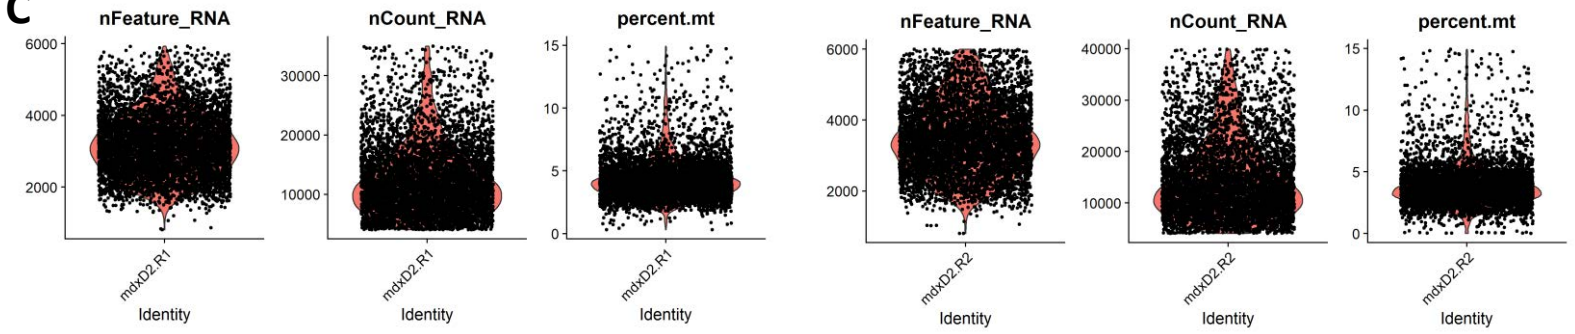**D**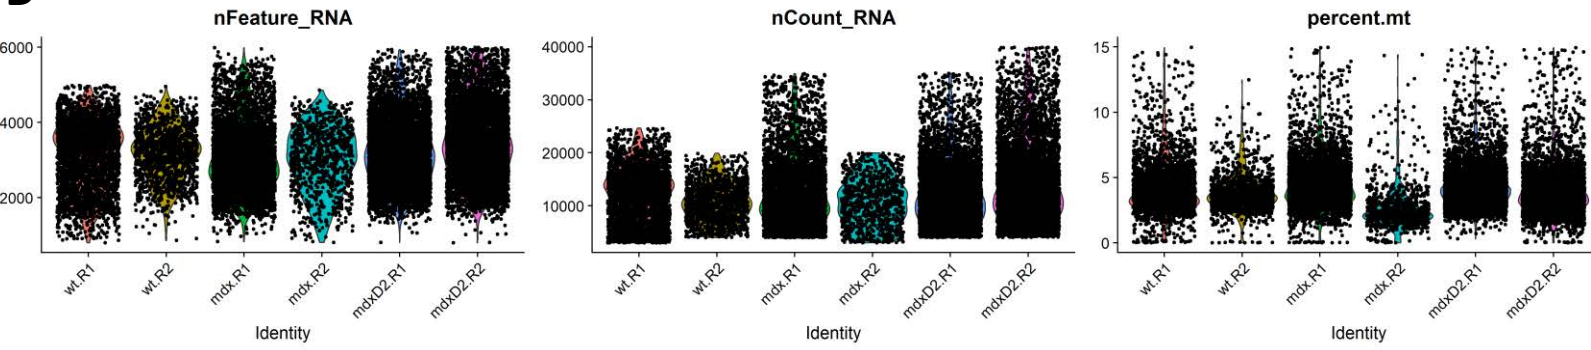**E**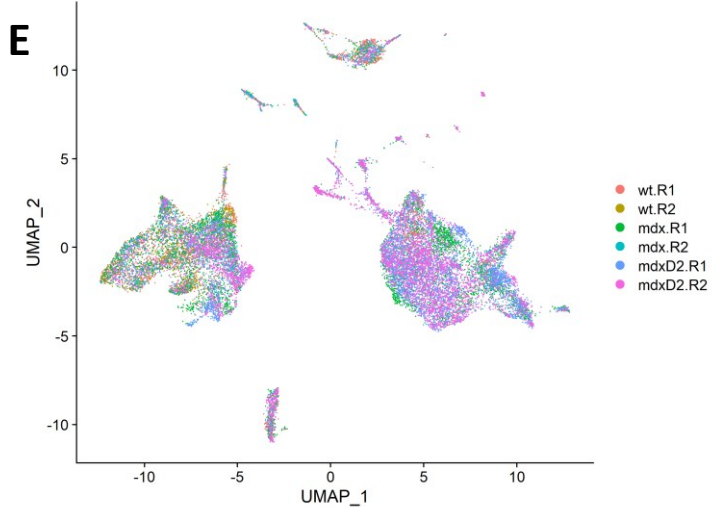

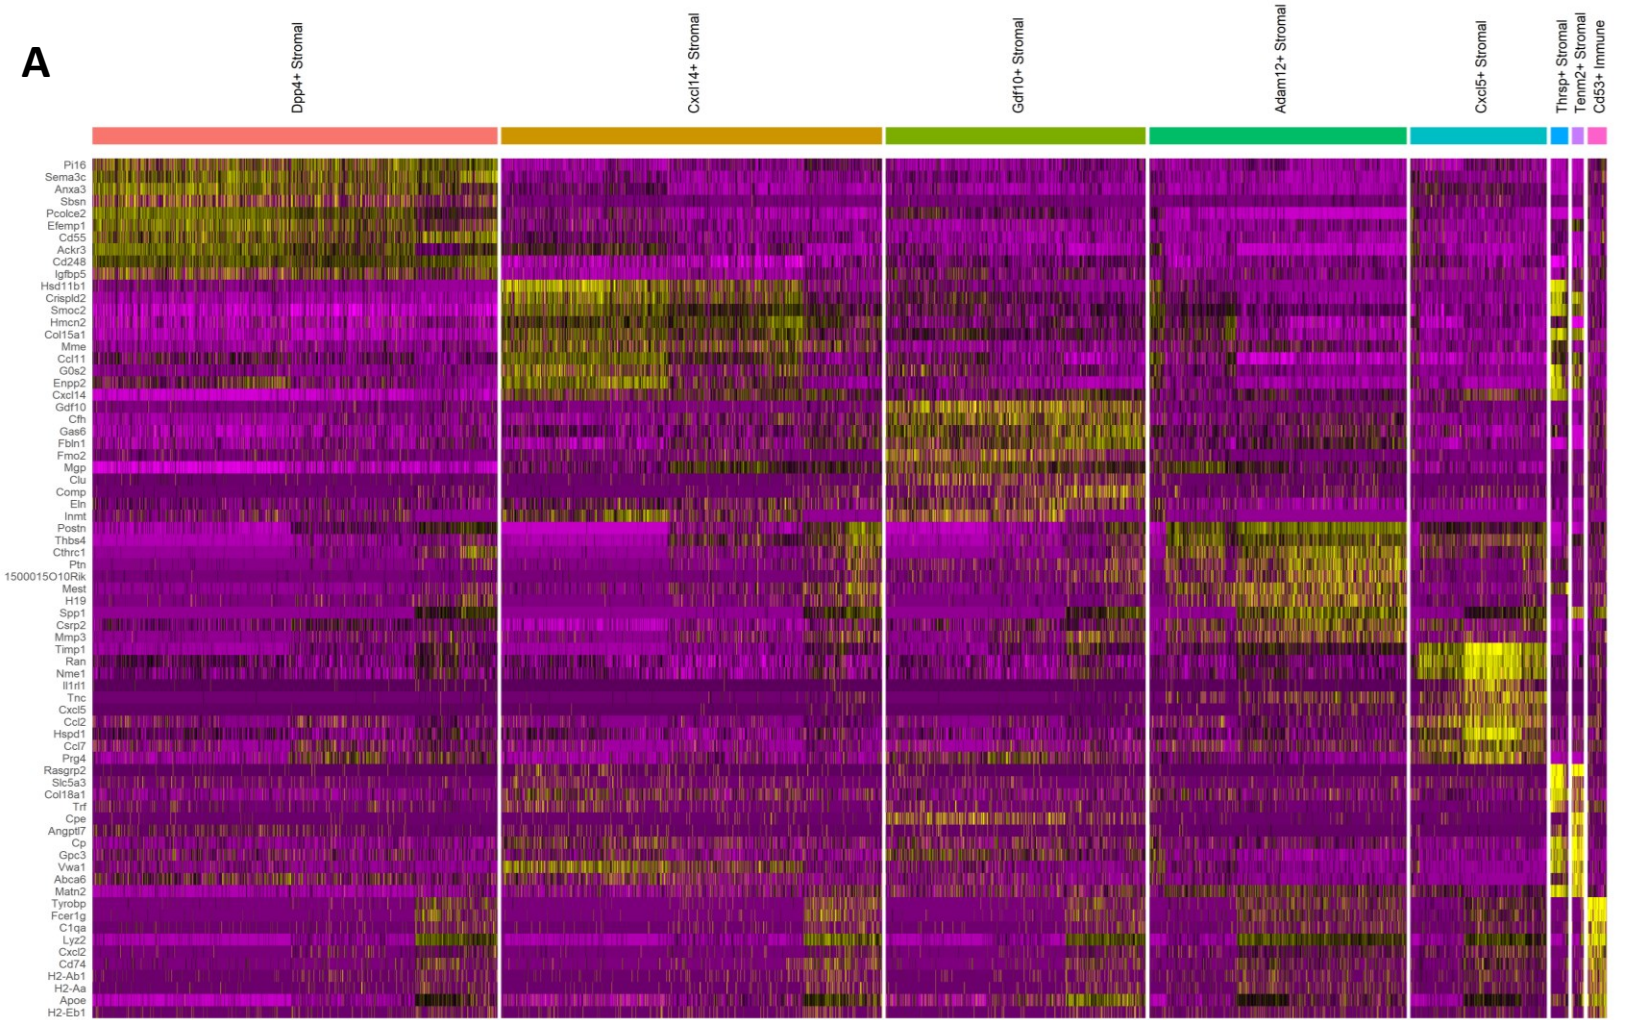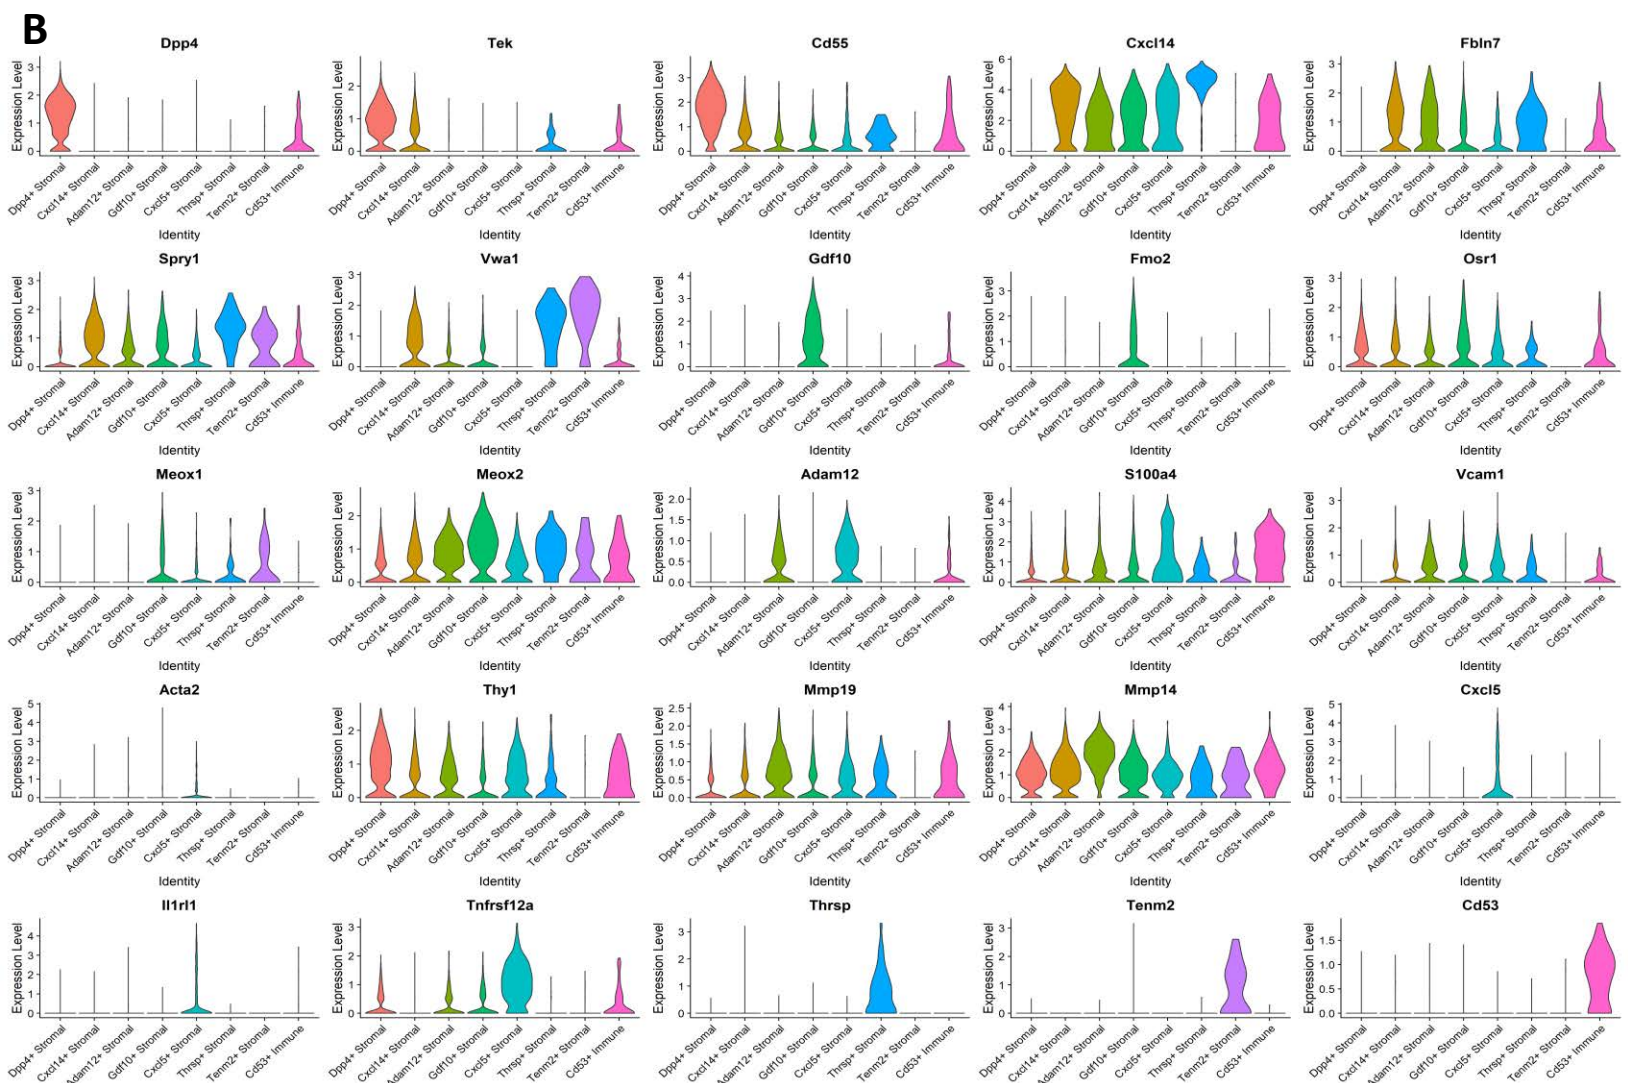

**A**

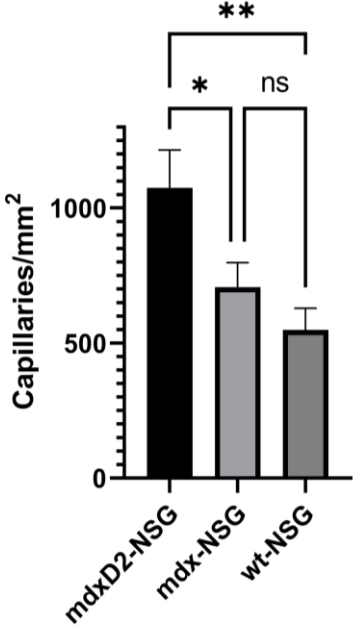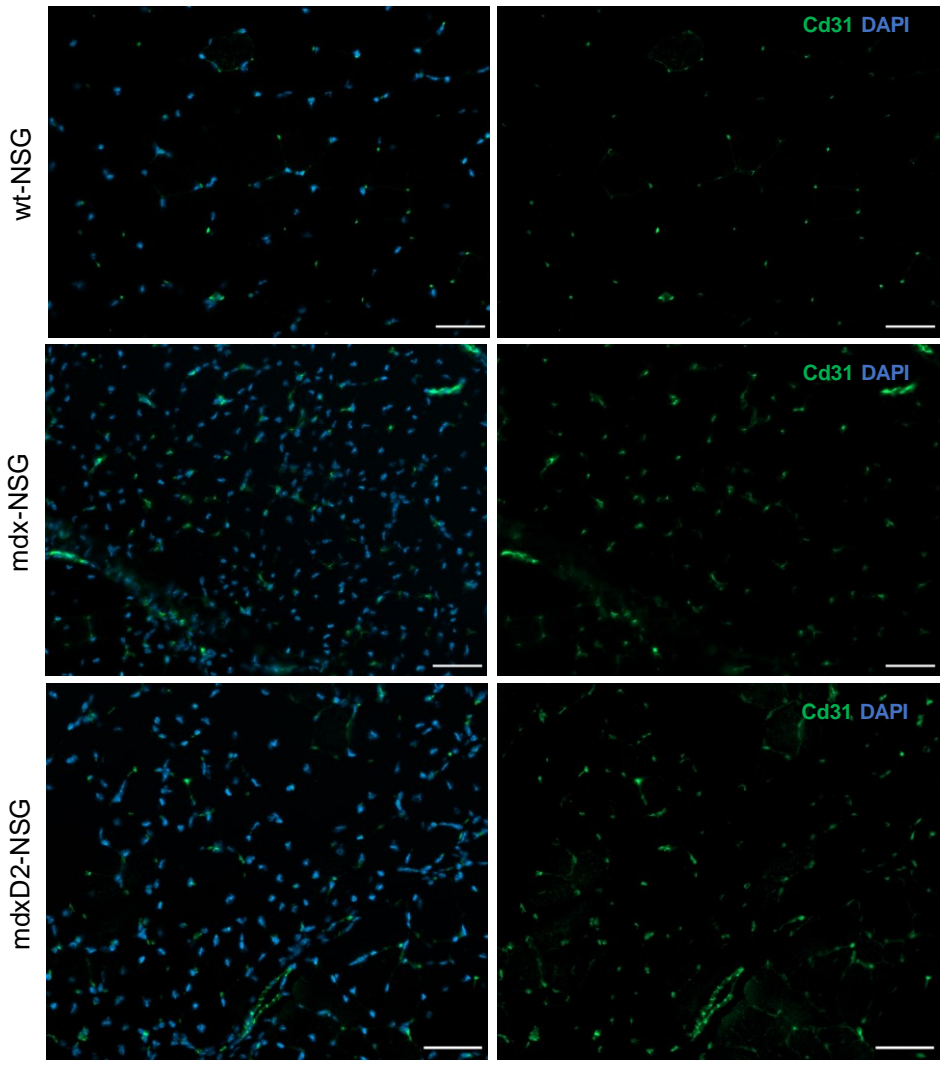

**B**

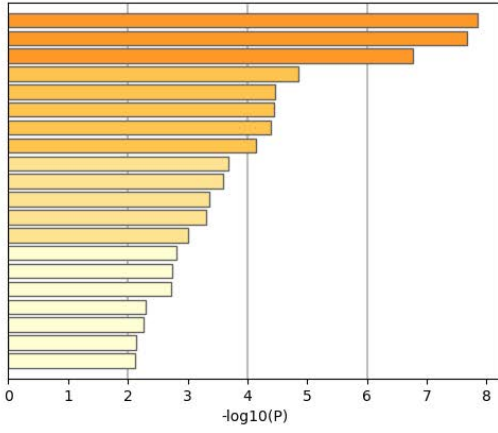

- GO:0001936: regulation of endothelial cell proliferation
- GO:0045765: regulation of angiogenesis
- R-MMU-446728: Cell junction organization
- GO:0045446: endothelial cell differentiation
- GO:2000047: regulation of cell-cell adhesion mediated by cadherin
- GO:1903053: regulation of extracellular matrix organization
- GO:0019755: one-carbon compound transport
- GO:0045216: cell-cell junction organization
- GO:0032272: negative regulation of protein polymerization
- GO:0090066: regulation of anatomical structure size
- WP1259: Retinol metabolism
- GO:0050680: negative regulation of epithelial cell proliferation
- GO:0051345: positive regulation of hydrolase activity
- GO:0030335: positive regulation of cell migration
- GO:0022604: regulation of cell morphogenesis
- GO:0007264: small GTPase mediated signal transduction
- GO:0032526: response to retinoic acid
- mmu04640: Hematopoietic cell lineage
- GO:0001666: response to hypoxia
- GO:0007163: establishment or maintenance of cell polarity

**C**

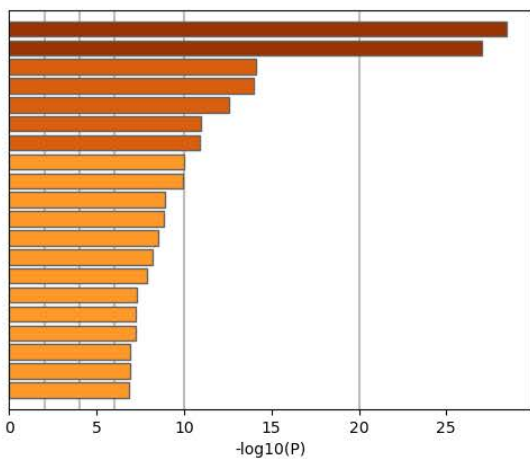

- GO:0030198: extracellular matrix organization
- R-MMU-1474244: Extracellular matrix organization
- R-MMU-381426: Regulation of Insulin-like Growth Factor (IGF) transport and uptake by Insulin-like Growth Factor Binding Proteins (IGFBPs)
- GO:0030335: positive regulation of cell migration
- GO:0032103: positive regulation of response to external stimulus
- GO:2000146: negative regulation of cell motility
- GO:0001503: ossification
- GO:0001944: vasculature development
- GO:0008285: negative regulation of cell population proliferation
- GO:0048589: developmental growth
- GO:0032963: collagen metabolic process
- GO:0030155: regulation of cell adhesion
- GO:0001501: skeletal system development
- R-MMU-2243919: Crosslinking of collagen fibrils
- GO:0002683: negative regulation of immune system process
- GO:0022612: gland morphogenesis
- GO:0014910: regulation of smooth muscle cell migration
- GO:0042060: wound healing
- GO:0045667: regulation of osteoblast differentiation
- GO:0050920: regulation of chemotaxis

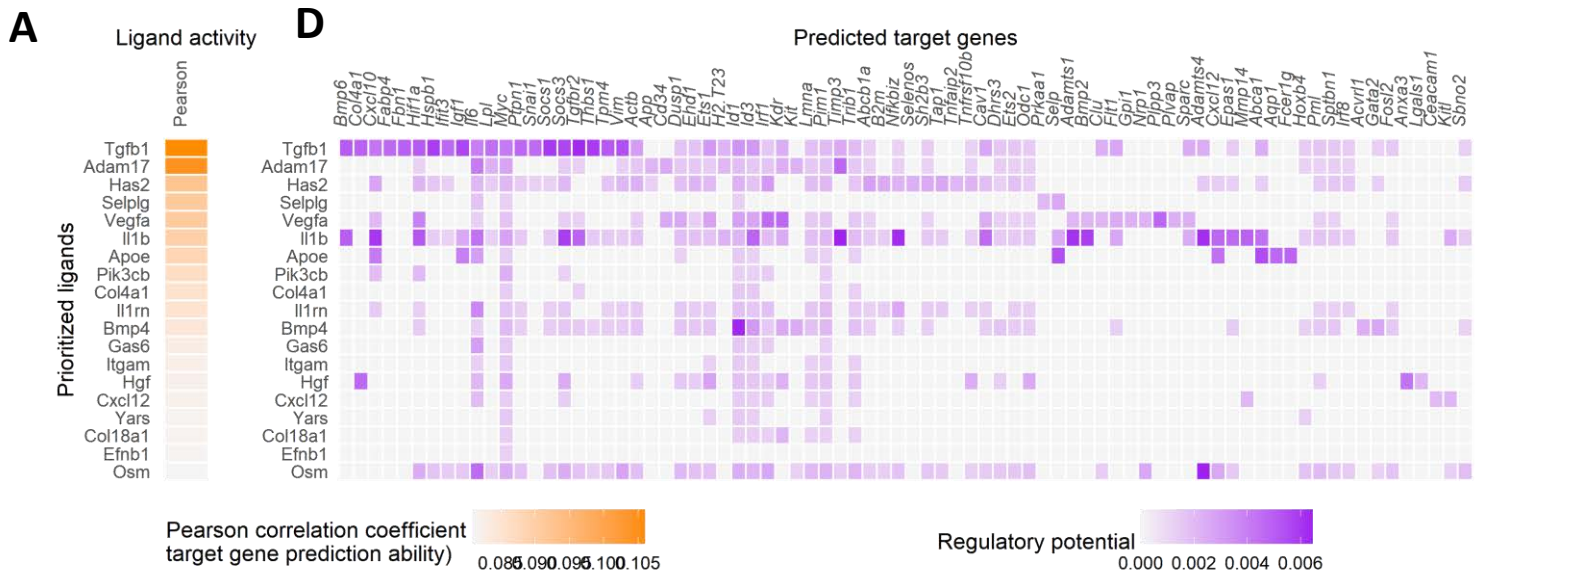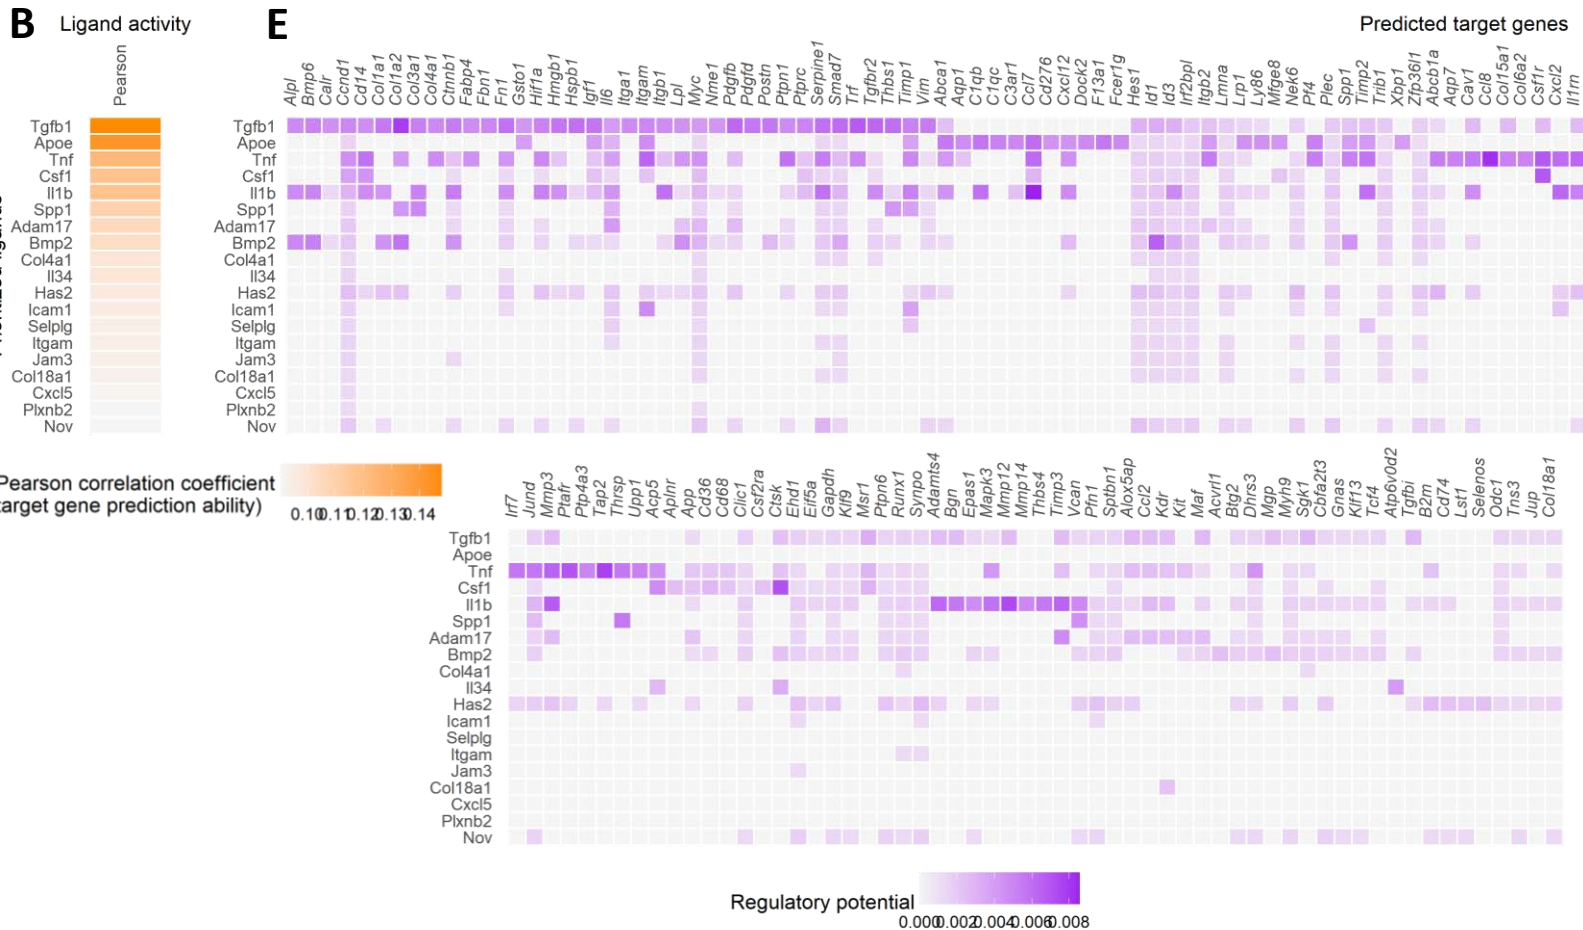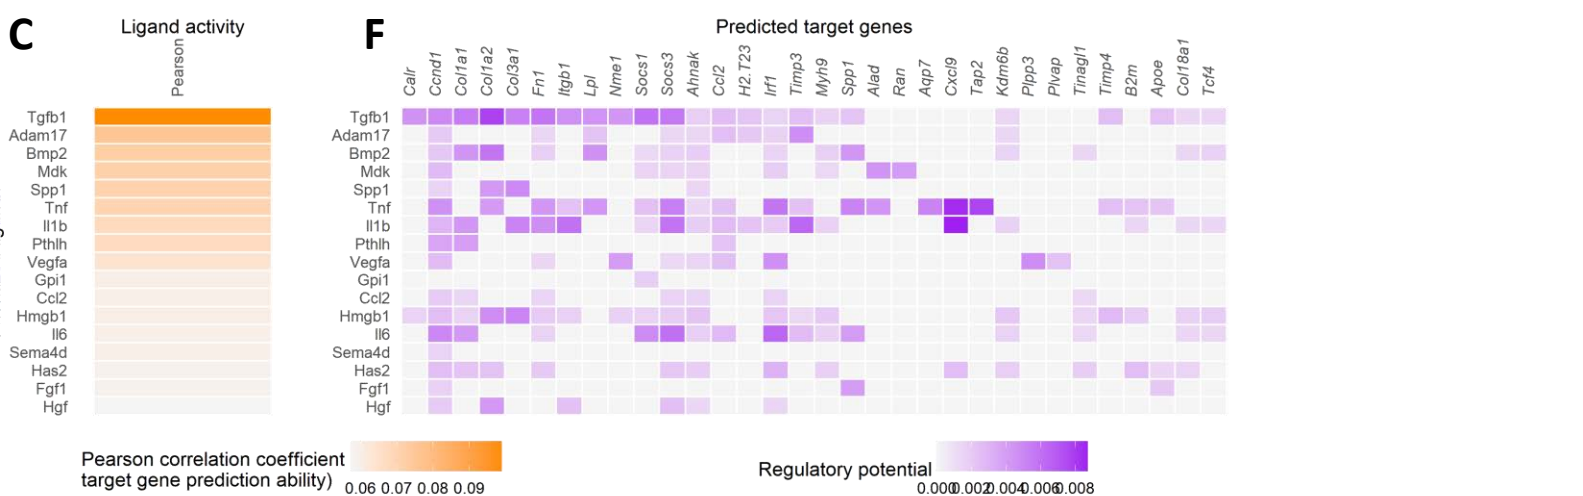

**G**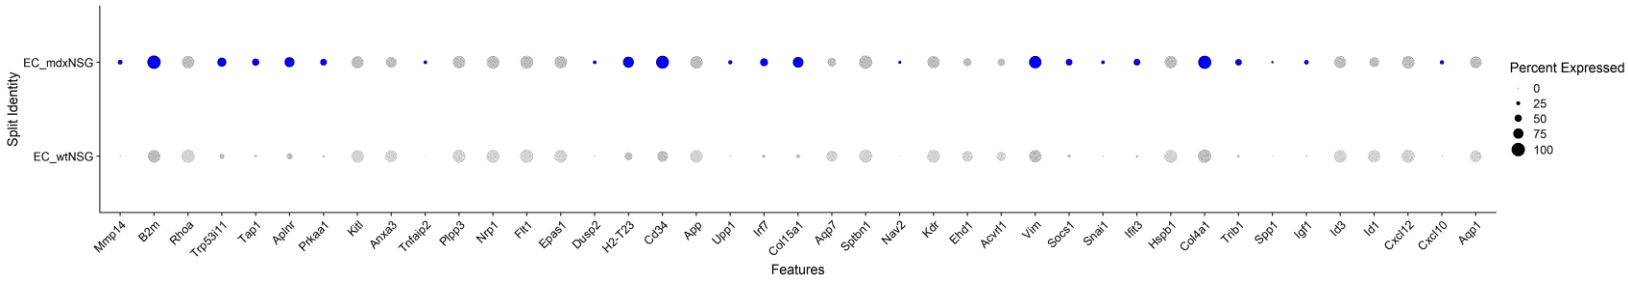**H**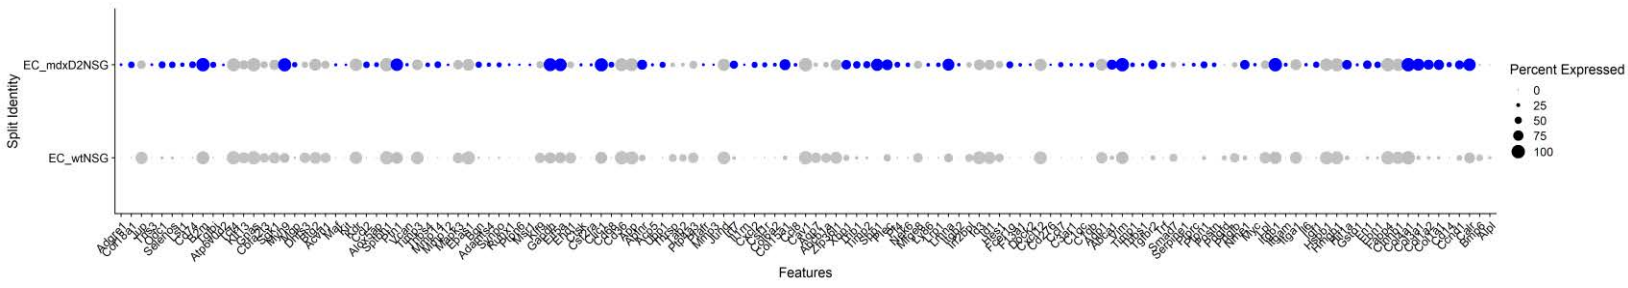**I**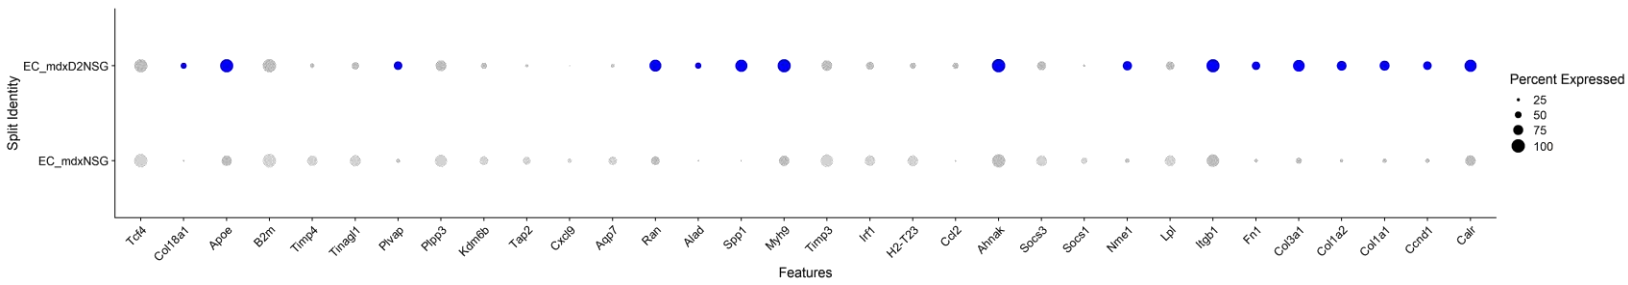

**A**

COLIV Cd31 DAPI

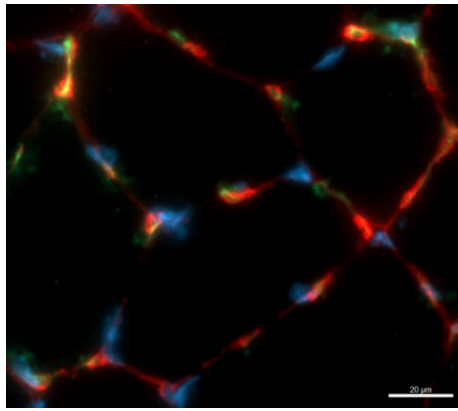

wt-NSG

**B**

COLI CD31 DAPI

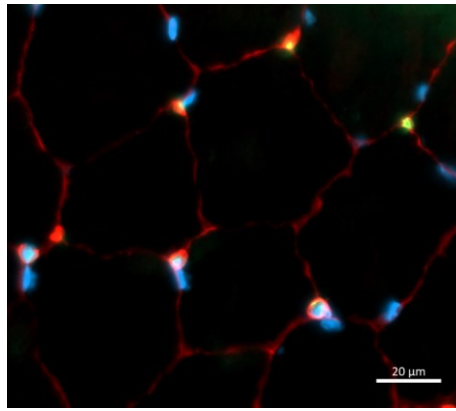

mdx-NSG

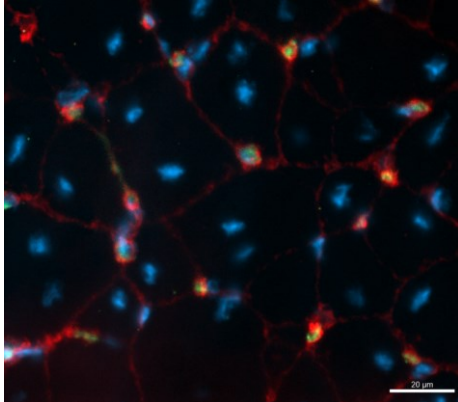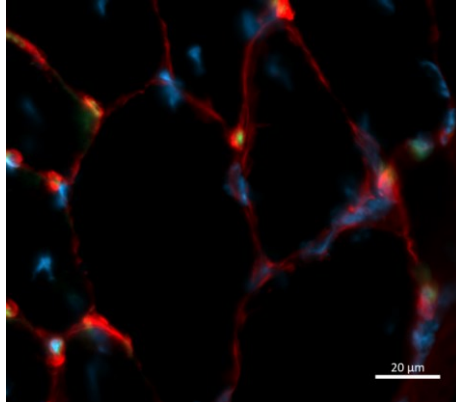**C**

COLVI CD31 DAPI

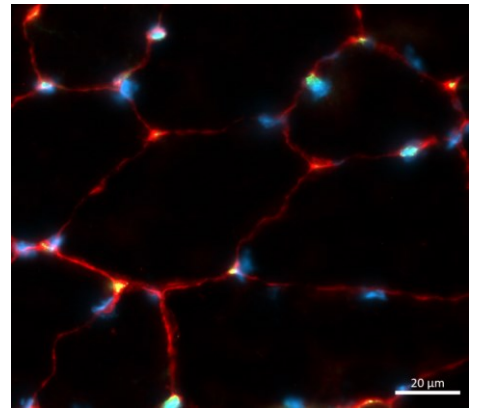

mdxD2-NSG

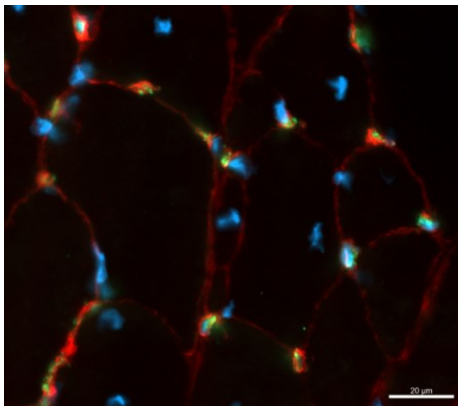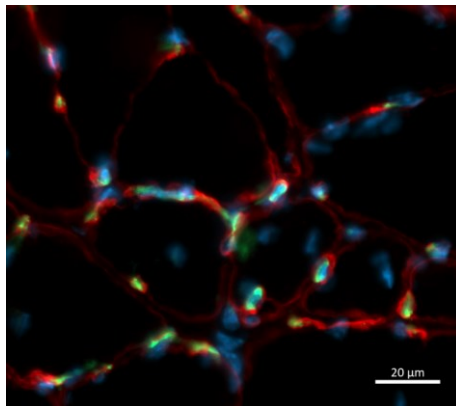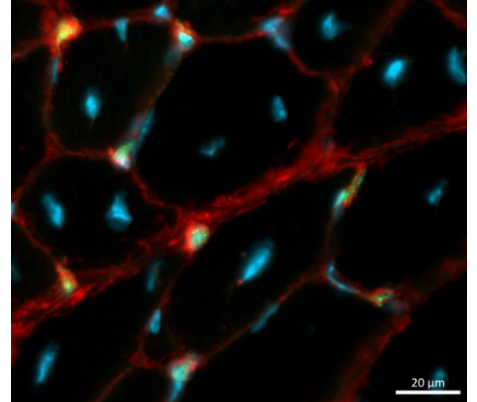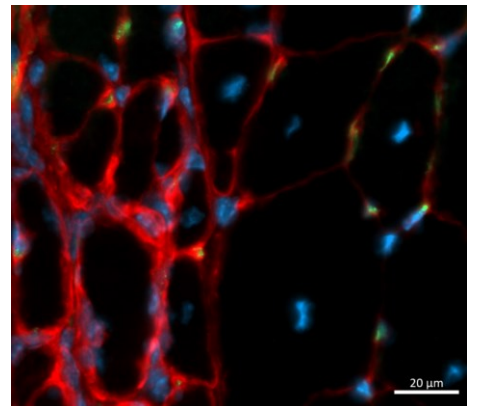

**A**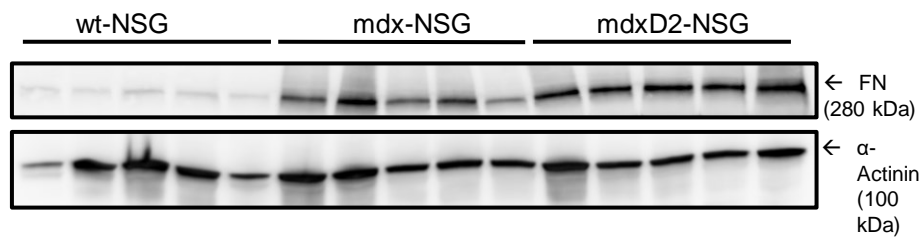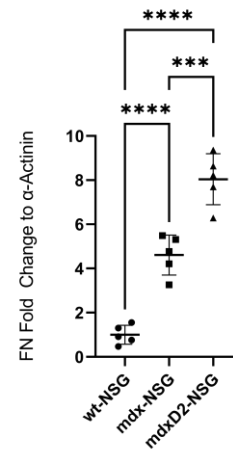**B**

wt-NSG

mdx-NSG

mdxD2-NSG

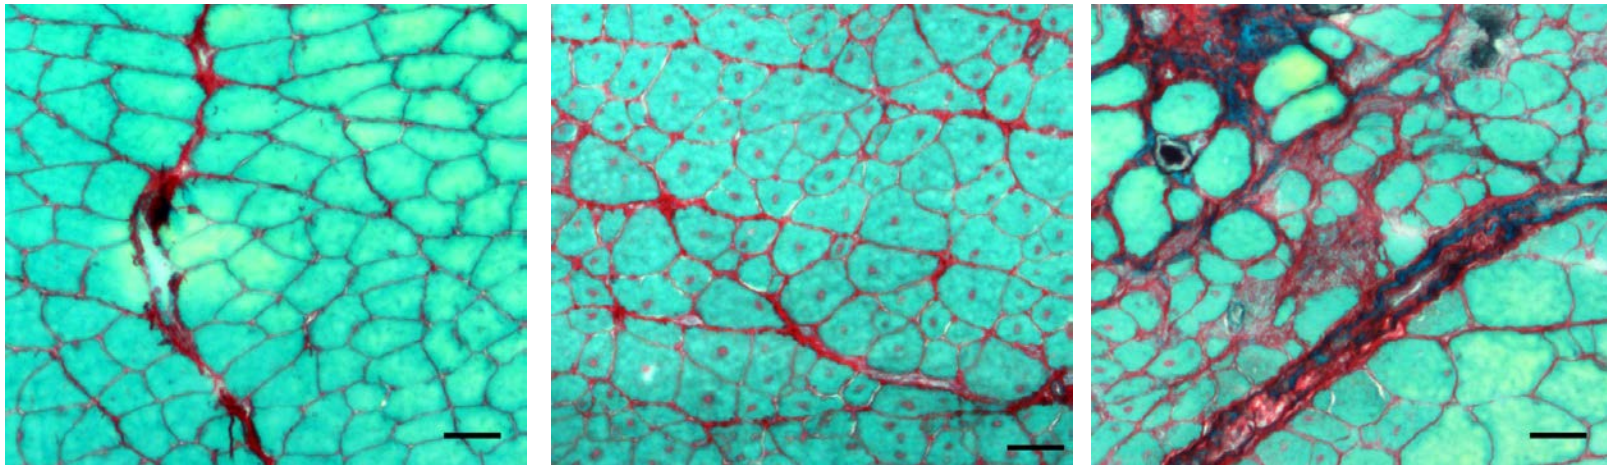**C**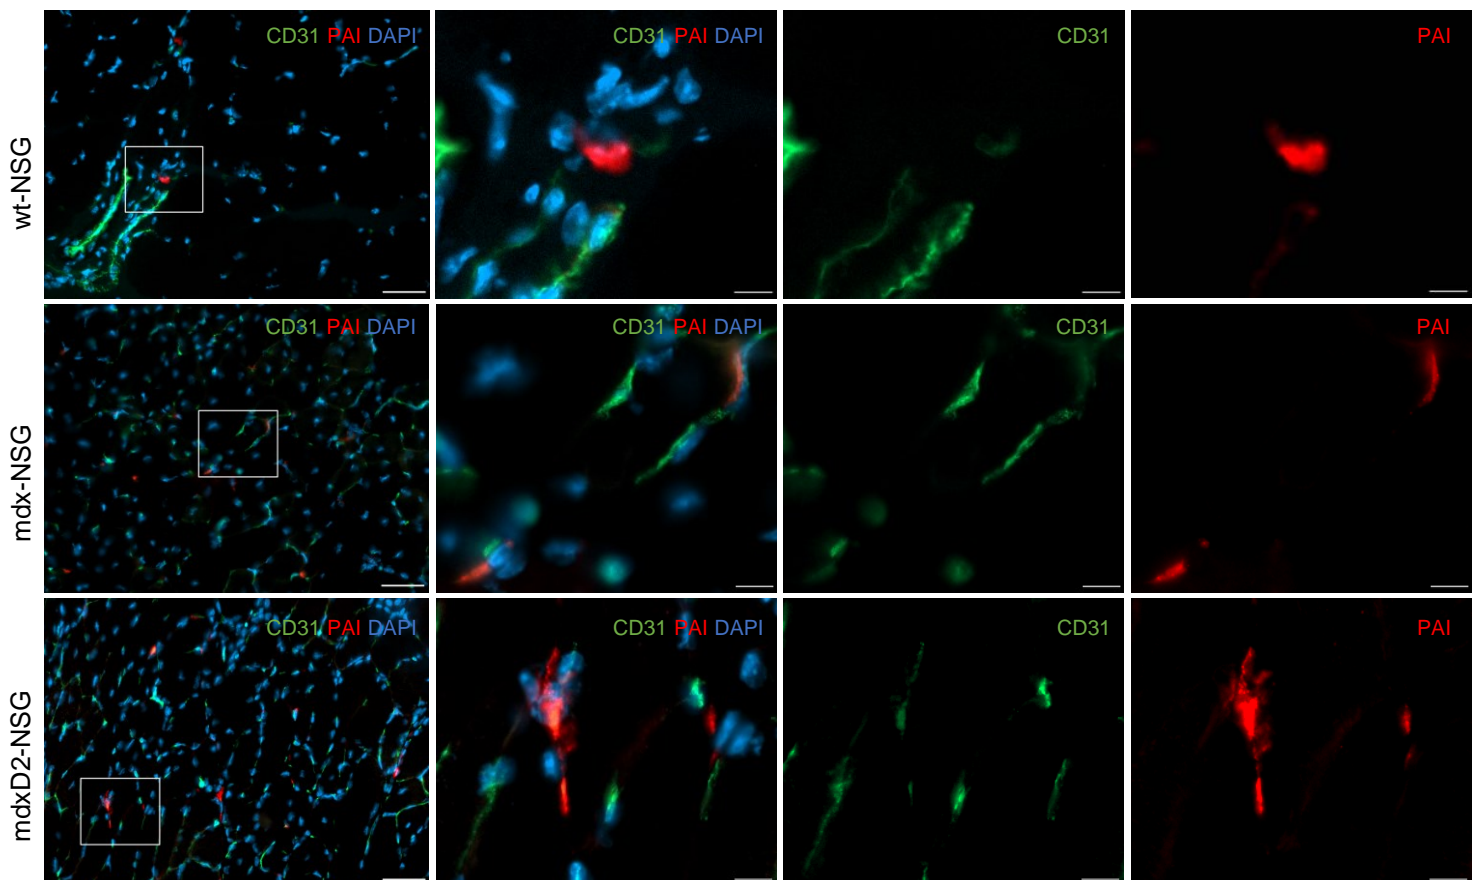



## SUPPLEMENTAL INFORMATION

### Supplemental Figures legends

#### Figure S1 Related to Figure 1: Quality control for scRNA-seq

Violin plots of analyzed samples showing the distribution of the number of genes (nFeature\_RNA), number of RNA counts (nCount\_RNA) and percent mitochondrial RNA (percent.mt) in (A) replicate 1 and 2 of wt-NSG gastrocnemius muscles. (B) replicate 1 and 2 of mdx-NSG gastrocnemius muscles. (C) Replicate 1 and 2 of gastrocnemius mdxD2-NSG muscles. (D) The integration of all sample replicates. (E) UMAP embedding of all muscles integrated grouped by replicates.

#### Figure S2 related to Figure 3: Gene expression profile of stromal cell subtypes.

(A) Heatmap of top 10 genes expressed in each stromal cell subtype.

(B) Violin plot of an expanded panel gene expression used to identify stromal cells subtypes.

#### Figure S3 related to Figure 5: Capillary endothelial cell differences

(A) Left: capillary Density of 8 weeks gastrocnemius muscles in each mouse model. Right: IF images of representative gastrocnemius muscle cross-sections of the mouse models used for quantification, only capillaries were counted per cross-section. Scale bar on IF images are at 20  $\mu\text{m}$ . Quantification was performed using ImageJ on at least 30 images for each mouse,  $n=3$  per mouse model. One Way-ANOVA with Tukey's multiple comparison test, mean+SD, \* $P<0.05$ , \*\* $P<0.01$

(B) GO enriched terms of DEGs in Capillary EC.1.

(C) GO enriched terms of DEGS in Capillary EC.2.

#### Figure S4 related to Figure 6: Outcome of NicheNet's ligand activity prediction released from stromal cells and macrophages in dystrophic muscle and their target gene expression regulated on EC.

Outcome of NicheNet's ligand activity prediction of stromal cells and macrophages in (A) mdx-NSG (wt-NSG as reference). (B) mdxD2-NSG (wt-NSG as reference) and (C) mdxD2-NSG (mdx-NSG as reference). Pearson correlation coefficient was used between prior regulatory potential scores and endothelial cell gene set assignments. Pearson correlation indicates the ability of each ligand to predict the endothelial cell (EC) target gene, therefore better predictive ligands are ranked higher.

NicheNet's ligand-target matrix denoting the regulatory potential between predicted released ligands and target gene from EC in (D) mdx-NSG ECs and (E) mdxD2-NSG ECs (F) mdxD2-NSG ECs (mdx-NSG as reference).

(G) Dot plot showing the average expression of NicheNet's predicted target genes on ECs in wt-NSG and mdx-NSG. (H) Dot plot showing the average expression of NicheNet's predicted target genes on ECs in wt-NSG and mdxD2-NSG. (I) Dot plot showing the average expression of NicheNet's predicted target genes on ECs in mdxD2- NSG and mdx-NSG

#### Figure S5 related to Figure 7: ECM protein staining in wt-NSG, mdx-NSG and mdxD2-NSG of gastrocnemius muscle cross sections

Immunofluorescence staining of gastrocnemius muscle cross-sections for vasculature (CD31, green), and nuclear marker (DAPI, blue) and column (A) collagen type IV (COLIV, red), (B) collagen type I (COLI, red), (C) Collagen type VI (COLVI, red) (Scale bar at 20  $\mu\text{m}$ ).

**Figure S6 related to figure 7: Validation of fibronectin and plasminogen activator inhibitor-1 upregulation in severely dystrophic gastrocnemius muscle**

- (A) Fibronectin (FN) expression analysis by western blotting in whole muscle lysates of healthy, dystrophic and severely dystrophic muscles (graph show individual data points of fold change to  $\alpha$ -Actinin, One way ANOVA with Tukey's multiple comparisons, mean $\pm$ SD. \*\*\* $P\leq 0.001$ , \*\*\*\* $P<0.001$ )
- (B) Sirius red stained gastrocnemius skeletal muscle cross-sections of healthy, dystrophic and severely dystrophic mouse models (Scale bar at 50  $\mu\text{m}$ ).
- (C) Immunofluorescence staining for plasminogen activator inhibitor-1 (PAI-1) and CD31 colocalization of gastrocnemius skeletal muscles across the mouse models.

**Table S1 related to Figure 1: Cell counts per mouse model**

| <b>Sample</b> | <b>Cell subpopulation</b> | <b>Cell Number</b> | <b>Proportion</b> |
|---------------|---------------------------|--------------------|-------------------|
| wtNSG         | MuSC                      | 97                 | 2.320574          |
| wtNSG         | MC                        | 62                 | 1.483254          |
| wtNSG         | EC                        | 519                | 12.41627          |
| wtNSG         | Stromal                   | 2604               | 62.29665          |
| wtNSG         | Peri                      | 78                 | 1.866029          |
| wtNSG         | Teno                      | 130                | 3.110048          |
| wtNSG         | Schwann                   | 10                 | 0.239234          |
| wtNSG         | Mphage                    | 639                | 15.28708          |
| wtNSG         | Neutro                    | 30                 | 0.717703          |
| wtNSG         | Mast                      | 11                 | 0.263158          |
| mdxNSG        | MuSC                      | 123                | 2.149222          |
| mdxNSG        | MC                        | 57                 | 0.995981          |
| mdxNSG        | EC                        | 222                | 3.879084          |
| mdxNSG        | Stromal                   | 2446               | 42.73982          |
| mdxNSG        | Peri                      | 33                 | 0.576621          |
| mdxNSG        | Teno                      | 216                | 3.774244          |
| mdxNSG        | Schwann                   | 5                  | 0.087367          |
| mdxNSG        | Mphage                    | 2560               | 44.73178          |
| mdxNSG        | Neutro                    | 38                 | 0.663987          |
| mdxNSG        | Mast                      | 10                 | 0.174734          |
| mdxNSG        | DC                        | 13                 | 0.227154          |
| mdxD2NSG      | MuSC                      | 49                 | 0.444767          |
| mdxD2NSG      | MC                        | 16                 | 0.14523           |
| mdxD2NSG      | EC                        | 249                | 2.260143          |
| mdxD2NSG      | Stromal                   | 2738               | 24.8525           |
| mdxD2NSG      | Peri                      | 49                 | 0.444767          |
| mdxD2NSG      | Teno                      | 330                | 2.995371          |
| mdxD2NSG      | Schwann                   | 10                 | 0.090769          |
| mdxD2NSG      | Mphage                    | 7426               | 67.40492          |
| mdxD2NSG      | Neutro                    | 64                 | 0.58092           |
| mdxD2NSG      | Mast                      | 6                  | 0.054461          |
| mdxD2NSG      | DC                        | 80                 | 0.72615           |

**Table S3 related to Figure 5: Top 20 genes expressed in each endothelial cell subpopulation cluster**

| p_val     | p_val_adj | avg_logFC | pct.1 | pct.2 | pct.diff | cluster        | gene            |
|-----------|-----------|-----------|-------|-------|----------|----------------|-----------------|
| 1.70E-98  | 3.37E-94  | 1.062243  | 0.99  | 0.733 | 0.257    | Capillary.EC.1 | <i>Gpihbp1</i>  |
| 9.88E-82  | 1.95E-77  | 1.131859  | 0.947 | 0.574 | 0.373    | Capillary.EC.1 | <i>Rgcc</i>     |
| 2.24E-68  | 4.43E-64  | 0.865167  | 0.962 | 0.727 | 0.235    | Capillary.EC.1 | <i>Kdr</i>      |
| 2.98E-68  | 5.90E-64  | 0.865231  | 0.96  | 0.746 | 0.214    | Capillary.EC.1 | <i>Tspan13</i>  |
| 1.72E-66  | 3.39E-62  | 0.863168  | 0.916 | 0.61  | 0.306    | Capillary.EC.1 | <i>Cd300lg</i>  |
| 1.56E-64  | 3.08E-60  | 0.626818  | 0.999 | 0.824 | 0.175    | Capillary.EC.1 | <i>Cdh5</i>     |
| 3.70E-64  | 7.31E-60  | 1.065456  | 0.948 | 0.636 | 0.312    | Capillary.EC.1 | <i>Aqp1</i>     |
| 4.18E-58  | 8.27E-54  | 0.758685  | 0.94  | 0.778 | 0.162    | Capillary.EC.1 | <i>Cd200</i>    |
| 7.53E-56  | 1.49E-51  | 0.891523  | 0.938 | 0.763 | 0.175    | Capillary.EC.1 | <i>Tcf15</i>    |
| 4.85E-55  | 9.60E-51  | 1.204337  | 0.789 | 0.445 | 0.344    | Capillary.EC.1 | <i>Timp4</i>    |
| 1.86E-54  | 3.68E-50  | 0.80661   | 0.913 | 0.737 | 0.176    | Capillary.EC.1 | <i>Cav2</i>     |
| 6.22E-53  | 1.23E-48  | 0.831158  | 0.808 | 0.487 | 0.321    | Capillary.EC.1 | <i>Clic5</i>    |
| 7.30E-53  | 1.44E-48  | 0.66859   | 0.996 | 0.841 | 0.155    | Capillary.EC.1 | <i>Ly6c1</i>    |
| 1.03E-52  | 2.04E-48  | 0.682497  | 0.872 | 0.659 | 0.213    | Capillary.EC.1 | <i>Ctnnbip1</i> |
| 2.54E-51  | 5.02E-47  | 0.738827  | 0.914 | 0.646 | 0.268    | Capillary.EC.1 | <i>C1qtnf9</i>  |
| 1.17E-49  | 2.31E-45  | 0.718219  | 0.841 | 0.57  | 0.271    | Capillary.EC.1 | <i>Jup</i>      |
| 1.31E-49  | 2.58E-45  | 0.779908  | 0.866 | 0.646 | 0.22     | Capillary.EC.1 | <i>Lims2</i>    |
| 1.22E-48  | 2.41E-44  | 0.685654  | 0.942 | 0.767 | 0.175    | Capillary.EC.1 | <i>Afdn</i>     |
| 6.95E-47  | 1.38E-42  | 0.811243  | 0.897 | 0.676 | 0.221    | Capillary.EC.1 | <i>Tcim</i>     |
| 1.07E-44  | 2.11E-40  | 0.966124  | 0.58  | 0.208 | 0.372    | Capillary.EC.1 | <i>Car4</i>     |
| 1.62E-44  | 3.20E-40  | 0.547063  | 0.944 | 0.75  | 0.194    | Capillary.EC.1 | <i>Emcn</i>     |
| 1.29E-90  | 2.56E-86  | 1.137749  | 0.59  | 0.013 | 0.577    | Capillary.EC.2 | <i>Scara5</i>   |
| 4.09E-77  | 8.10E-73  | 0.536022  | 0.41  | 0.005 | 0.405    | Capillary.EC.2 | <i>Mme</i>      |
| 6.00E-75  | 1.19E-70  | 1.300116  | 0.692 | 0.032 | 0.66     | Capillary.EC.2 | <i>Abi3bp</i>   |
| 1.34E-69  | 2.65E-65  | 0.750619  | 0.538 | 0.016 | 0.522    | Capillary.EC.2 | <i>Svep1</i>    |
| 4.34E-66  | 8.59E-62  | 0.585115  | 0.538 | 0.018 | 0.52     | Capillary.EC.2 | <i>Zfhx4</i>    |
| 2.94E-64  | 5.81E-60  | 0.487362  | 0.385 | 0.006 | 0.379    | Capillary.EC.2 | <i>Sox9</i>     |
| 3.96E-64  | 7.84E-60  | 0.964631  | 0.538 | 0.02  | 0.518    | Capillary.EC.2 | <i>Fbln1</i>    |
| 3.81E-62  | 7.54E-58  | 0.960262  | 0.513 | 0.018 | 0.495    | Capillary.EC.2 | <i>Gfpt2</i>    |
| 2.43E-58  | 4.80E-54  | 1.075102  | 0.513 | 0.021 | 0.492    | Capillary.EC.2 | <i>Dpep1</i>    |
| 1.09E-55  | 2.15E-51  | 1.194491  | 0.667 | 0.045 | 0.622    | Capillary.EC.2 | <i>Fndc1</i>    |
| 1.27E-55  | 2.50E-51  | 0.655964  | 0.487 | 0.019 | 0.468    | Capillary.EC.2 | <i>Podn</i>     |
| 2.30E-55  | 4.55E-51  | 1.001715  | 0.641 | 0.041 | 0.6      | Capillary.EC.2 | <i>Pdgfra</i>   |
| 7.12E-51  | 1.41E-46  | 1.281911  | 0.487 | 0.023 | 0.464    | Capillary.EC.2 | <i>Angptl1</i>  |
| 2.36E-49  | 4.68E-45  | 0.644649  | 0.436 | 0.017 | 0.419    | Capillary.EC.2 | <i>Arhgap20</i> |
| 6.31E-49  | 1.25E-44  | 1.099917  | 0.615 | 0.044 | 0.571    | Capillary.EC.2 | <i>Loxl1</i>    |
| 6.74E-49  | 1.33E-44  | 1.238539  | 0.59  | 0.04  | 0.55     | Capillary.EC.2 | <i>Htra3</i>    |
| 2.29E-48  | 4.54E-44  | 0.757599  | 0.538 | 0.031 | 0.507    | Capillary.EC.2 | <i>Scn7a</i>    |
| 7.91E-48  | 1.57E-43  | 0.677453  | 0.487 | 0.024 | 0.463    | Capillary.EC.2 | <i>Lpar1</i>    |
| 4.74E-46  | 9.38E-42  | 0.564926  | 0.564 | 0.036 | 0.528    | Capillary.EC.2 | <i>Egfr</i>     |
| 6.07E-46  | 1.20E-41  | 0.535627  | 0.41  | 0.016 | 0.394    | Capillary.EC.2 | <i>Scara3</i>   |
| 2.82E-152 | 5.58E-148 | 0.681372  | 0.768 | 0.011 | 0.757    | Activated.EC   | <i>Arhgap30</i> |

|           |           |          |       |       |       |              |                  |
|-----------|-----------|----------|-------|-------|-------|--------------|------------------|
| 1.20E-148 | 2.37E-144 | 1.227475 | 0.826 | 0.019 | 0.807 | Activated.EC | <i>Fcgr2b</i>    |
| 1.17E-144 | 2.31E-140 | 1.308057 | 0.884 | 0.03  | 0.854 | Activated.EC | <i>Fyb</i>       |
| 6.71E-141 | 1.33E-136 | 1.156838 | 0.725 | 0.012 | 0.713 | Activated.EC | <i>Ms4a6b</i>    |
| 1.32E-139 | 2.61E-135 | 1.153249 | 0.841 | 0.026 | 0.815 | Activated.EC | <i>Adgre1</i>    |
| 5.90E-139 | 1.17E-134 | 1.83153  | 0.899 | 0.037 | 0.862 | Activated.EC | <i>Cybb</i>      |
| 3.69E-138 | 7.30E-134 | 0.998384 | 0.855 | 0.028 | 0.827 | Activated.EC | <i>Ncf2</i>      |
| 1.85E-137 | 3.67E-133 | 1.321298 | 0.826 | 0.026 | 0.8   | Activated.EC | <i>C3ar1</i>     |
| 3.35E-137 | 6.64E-133 | 1.099285 | 0.855 | 0.03  | 0.825 | Activated.EC | <i>Spi1</i>      |
| 2.94E-136 | 5.81E-132 | 0.711061 | 0.609 | 0.004 | 0.605 | Activated.EC | <i>Tnfaip8l2</i> |
| 4.74E-136 | 9.38E-132 | 1.157516 | 0.812 | 0.024 | 0.788 | Activated.EC | <i>Aif1</i>      |
| 1.54E-135 | 3.05E-131 | 0.810659 | 0.768 | 0.019 | 0.749 | Activated.EC | <i>Clec4a1</i>   |
| 3.62E-135 | 7.17E-131 | 1.588221 | 0.855 | 0.031 | 0.824 | Activated.EC | <i>Ms4a6c</i>    |
| 7.76E-134 | 1.54E-129 | 1.39379  | 0.913 | 0.041 | 0.872 | Activated.EC | <i>Ptprc</i>     |
| 1.04E-133 | 2.05E-129 | 0.739551 | 0.667 | 0.009 | 0.658 | Activated.EC | <i>Dock2</i>     |
| 1.21E-132 | 2.40E-128 | 1.230584 | 0.855 | 0.031 | 0.824 | Activated.EC | <i>Ly86</i>      |
| 1.36E-130 | 2.70E-126 | 0.957598 | 0.768 | 0.021 | 0.747 | Activated.EC | <i>Csf2ra</i>    |
| 3.29E-130 | 6.51E-126 | 0.731448 | 0.667 | 0.01  | 0.657 | Activated.EC | <i>Epsti1</i>    |
| 1.72E-129 | 3.39E-125 | 0.966317 | 0.696 | 0.014 | 0.682 | Activated.EC | <i>Fcgr1</i>     |
| 1.01E-128 | 1.99E-124 | 1.990227 | 0.942 | 0.055 | 0.887 | Activated.EC | <i>Laptm5</i>    |
| 4.66E-87  | 9.22E-83  | 1.302079 | 0.664 | 0.06  | 0.604 | Arterial.EC  | <i>Alpl</i>      |
| 1.71E-86  | 3.38E-82  | 1.458309 | 0.744 | 0.093 | 0.651 | Arterial.EC  | <i>Sema3g</i>    |
| 1.71E-84  | 3.38E-80  | 1.770119 | 0.8   | 0.127 | 0.673 | Arterial.EC  | <i>Fbln5</i>     |
| 2.46E-80  | 4.87E-76  | 1.729555 | 0.88  | 0.177 | 0.703 | Arterial.EC  | <i>Stmn2</i>     |
| 5.95E-80  | 1.18E-75  | 1.017539 | 0.456 | 0.018 | 0.438 | Arterial.EC  | <i>Gja5</i>      |
| 2.67E-79  | 5.28E-75  | 1.148044 | 0.624 | 0.06  | 0.564 | Arterial.EC  | <i>Col8a1</i>    |
| 1.80E-67  | 3.56E-63  | 0.789036 | 0.528 | 0.045 | 0.483 | Arterial.EC  | <i>Eps8l2</i>    |
| 4.49E-61  | 8.89E-57  | 0.706346 | 0.472 | 0.037 | 0.435 | Arterial.EC  | <i>Crispld1</i>  |
| 1.30E-60  | 2.58E-56  | 0.782563 | 0.488 | 0.043 | 0.445 | Arterial.EC  | <i>St8sia6</i>   |
| 1.63E-60  | 3.22E-56  | 1.355213 | 0.784 | 0.166 | 0.618 | Arterial.EC  | <i>Gja4</i>      |
| 1.46E-58  | 2.90E-54  | 1.206113 | 0.704 | 0.13  | 0.574 | Arterial.EC  | <i>Hey1</i>      |
| 2.07E-58  | 4.09E-54  | 0.464141 | 0.264 | 0.002 | 0.262 | Arterial.EC  | <i>Nebl</i>      |
| 1.38E-50  | 2.74E-46  | 1.280464 | 0.6   | 0.104 | 0.496 | Arterial.EC  | <i>Edn1</i>      |
| 3.49E-42  | 6.90E-38  | 0.933705 | 0.512 | 0.09  | 0.422 | Arterial.EC  | <i>Vegfc</i>     |
| 1.73E-37  | 3.42E-33  | 0.476869 | 0.288 | 0.022 | 0.266 | Arterial.EC  | <i>Alox12</i>    |
| 3.96E-35  | 7.83E-31  | 0.67643  | 0.44  | 0.077 | 0.363 | Arterial.EC  | <i>Atp2a3</i>    |
| 1.46E-33  | 2.88E-29  | 0.760157 | 0.432 | 0.077 | 0.355 | Arterial.EC  | <i>Tgfb2</i>     |
| 1.46E-32  | 2.89E-28  | 0.831464 | 0.464 | 0.099 | 0.365 | Arterial.EC  | <i>Palld</i>     |
| 3.06E-32  | 6.06E-28  | 0.551942 | 0.392 | 0.061 | 0.331 | Arterial.EC  | <i>Car7</i>      |
| 5.44E-31  | 1.08E-26  | 1.000036 | 0.76  | 0.351 | 0.409 | Arterial.EC  | <i>Pdcd4</i>     |
| 7.03E-138 | 1.39E-133 | 2.182839 | 0.782 | 0.025 | 0.757 | Venous.EC    | <i>Selp</i>      |
| 1.62E-104 | 3.21E-100 | 1.273694 | 0.828 | 0.062 | 0.766 | Venous.EC    | <i>Chp2</i>      |
| 7.25E-81  | 1.43E-76  | 1.220817 | 0.69  | 0.056 | 0.634 | Venous.EC    | <i>Slco2a1</i>   |
| 6.41E-77  | 1.27E-72  | 2.120923 | 1     | 0.217 | 0.783 | Venous.EC    | <i>Plvap</i>     |
| 4.35E-75  | 8.60E-71  | 2.06285  | 0.897 | 0.146 | 0.751 | Venous.EC    | <i>Lrg1</i>      |
| 3.61E-74  | 7.15E-70  | 0.845658 | 0.575 | 0.039 | 0.536 | Venous.EC    | <i>Ctnnal1</i>   |
| 3.88E-64  | 7.67E-60  | 1.898819 | 0.954 | 0.239 | 0.715 | Venous.EC    | <i>Vwf</i>       |

|           |           |          |       |       |       |           |                 |
|-----------|-----------|----------|-------|-------|-------|-----------|-----------------|
| 6.09E-63  | 1.20E-58  | 1.171017 | 0.862 | 0.156 | 0.706 | Venous.EC | <i>Ptgs1</i>    |
| 7.75E-61  | 1.53E-56  | 1.206662 | 0.356 | 0.011 | 0.345 | Venous.EC | <i>Ackr1</i>    |
| 1.25E-56  | 2.48E-52  | 0.832853 | 0.644 | 0.076 | 0.568 | Venous.EC | <i>Cysltr1</i>  |
| 4.21E-56  | 8.33E-52  | 0.981141 | 0.529 | 0.049 | 0.48  | Venous.EC | <i>Vcam1</i>    |
| 9.33E-56  | 1.85E-51  | 0.773888 | 0.701 | 0.1   | 0.601 | Venous.EC | <i>Thsd7a</i>   |
| 6.20E-54  | 1.23E-49  | 1.820038 | 0.989 | 0.421 | 0.568 | Venous.EC | <i>Ehd4</i>     |
| 1.45E-52  | 2.87E-48  | 0.599418 | 0.414 | 0.026 | 0.388 | Venous.EC | <i>Lepr</i>     |
| 9.73E-51  | 1.93E-46  | 0.473249 | 0.276 | 0.007 | 0.269 | Venous.EC | <i>Fam174b</i>  |
| 3.17E-49  | 6.28E-45  | 1.670995 | 1     | 0.503 | 0.497 | Venous.EC | <i>Il6st</i>    |
| 1.75E-48  | 3.46E-44  | 1.280101 | 0.816 | 0.193 | 0.623 | Venous.EC | <i>Rasa4</i>    |
| 2.53E-46  | 5.01E-42  | 0.499891 | 0.287 | 0.01  | 0.277 | Venous.EC | <i>Enpp6</i>    |
| 3.45E-46  | 6.82E-42  | 0.893335 | 0.471 | 0.049 | 0.422 | Venous.EC | <i>Lbp</i>      |
| 4.11E-46  | 8.12E-42  | 0.530151 | 0.402 | 0.031 | 0.371 | Venous.EC | <i>Plekha7</i>  |
| 1.36E-42  | 2.68E-38  | 1.468284 | 0.92  | 0.294 | 0.626 | Venous.EC | <i>Eln</i>      |
| 2.60E-178 | 5.15E-174 | 2.834275 | 0.941 | 0.05  | 0.891 | Pericytes | <i>Vtn</i>      |
| 2.07E-174 | 4.10E-170 | 2.736126 | 0.901 | 0.041 | 0.86  | Pericytes | <i>Kcnj8</i>    |
| 3.61E-170 | 7.15E-166 | 2.418101 | 0.954 | 0.065 | 0.889 | Pericytes | <i>Pdgfrb</i>   |
| 6.07E-167 | 1.20E-162 | 1.855282 | 0.888 | 0.039 | 0.849 | Pericytes | <i>Gucy1a1</i>  |
| 1.72E-166 | 3.40E-162 | 1.920828 | 0.921 | 0.051 | 0.87  | Pericytes | <i>Notch3</i>   |
| 1.77E-163 | 3.51E-159 | 2.356185 | 0.934 | 0.064 | 0.87  | Pericytes | <i>Steap4</i>   |
| 3.35E-160 | 6.63E-156 | 2.506243 | 0.901 | 0.059 | 0.842 | Pericytes | <i>Abcc9</i>    |
| 3.95E-156 | 7.81E-152 | 1.723156 | 0.875 | 0.049 | 0.826 | Pericytes | <i>Gucy1b1</i>  |
| 1.68E-155 | 3.32E-151 | 1.651181 | 0.803 | 0.028 | 0.775 | Pericytes | <i>Rgs4</i>     |
| 9.01E-154 | 1.78E-149 | 1.352332 | 0.77  | 0.024 | 0.746 | Pericytes | <i>Heyl</i>     |
| 2.21E-153 | 4.37E-149 | 1.867014 | 0.855 | 0.048 | 0.807 | Pericytes | <i>Higd1b</i>   |
| 2.09E-149 | 4.14E-145 | 1.805337 | 0.882 | 0.062 | 0.82  | Pericytes | <i>Cox4i2</i>   |
| 2.05E-143 | 4.05E-139 | 2.107985 | 0.934 | 0.092 | 0.842 | Pericytes | <i>Aspn</i>     |
| 1.05E-141 | 2.07E-137 | 1.196336 | 0.77  | 0.035 | 0.735 | Pericytes | <i>Arhgef17</i> |
| 5.20E-134 | 1.03E-129 | 2.38312  | 0.934 | 0.115 | 0.819 | Pericytes | <i>Ndufa4l2</i> |
| 2.23E-133 | 4.41E-129 | 1.686806 | 0.868 | 0.079 | 0.789 | Pericytes | <i>Cygb</i>     |
| 2.32E-127 | 4.58E-123 | 1.32045  | 0.822 | 0.069 | 0.753 | Pericytes | <i>Lhfp</i>     |
| 2.97E-127 | 5.88E-123 | 1.109595 | 0.664 | 0.023 | 0.641 | Pericytes | <i>Itga7</i>    |
| 1.09E-125 | 2.15E-121 | 1.188494 | 0.724 | 0.037 | 0.687 | Pericytes | <i>Atp1b2</i>   |
| 7.59E-125 | 1.50E-120 | 1.122424 | 0.724 | 0.04  | 0.684 | Pericytes | <i>Cystm1</i>   |
